# Supplementary material for: Secondary prevention of Alzheimer’s dementia: neuroimaging contributions
Source: PubMed Central journal article supplement (PMC6208183; doi:10.1186/s13195-018-0438-z), 2018-10-30
Supplement: 13195_2018_438_MOESM1_ESM.pdf [file 13195_2018_438_MOESM1_ESM.pdf]

## **Secondary prevention of Alzheimer's dementia - neuroimaging contributions**

Mara ten Kate, Silvia Ingala, Adam J. Schwarz, Nick C. Fox, Gaël Chételat, Bart N.M. van Berckel, Michael Ewers, Christopher Foley, Juan Domingo Gispert, Derek Hill, Michael C. Irizarry, Adriaan A. Lammertsma, José Luis Molinuevo, Craig Ritchie, Philip Scheltens, Mark E. Schmidt, Pieter Jelle Visser, Adam Waldman, Joanna Wardlaw, Sven Haller, Frederik Barkhof

## **Supplementary Tables**

**Table S1: Incidental findings on MRI that may interfere with assessment of clinical and/or cognitive outcomes**

|                                                                    |
|--------------------------------------------------------------------|
| <b>Clinically significant findings (reasons for exclusion)</b>     |
| Subdural hematoma with compression                                 |
| Territorial infarcts                                               |
| Recent parenchymal haemorrhage                                     |
| Obstructive hydrocephalus                                          |
| Malignant intra-axial tumours (gliomas, metastases)                |
| Large extra-axial tumours                                          |
| <b>Potentially significant findings</b>                            |
| Clear evidence of a neurodegenerative disorder other than AD       |
| Extensive deep white matter lesions (Fazekas grade 3)              |
| Multiple lacunes (>4)                                              |
| Small chronic subdural hematoma or effusion without compression    |
| Small benign extra-axial tumours without mass effect               |
| Communicating hydrocephalus                                        |
| Aneurysms, AVM or cavernoma                                        |
| Large arachnoid cysts with compression                             |
| Carotid occlusion                                                  |
| Cerebral microbleeds with evidence of past macroscopic haemorrhage |
| Demyelinating disease                                              |
| Significant osseous and extra-cranial soft tissue pathology        |

**Table S2: Effect of amyloid on longitudinal MRI measures in cognitively normal subjects.**

| Reference            | Study Design |                     |               |          | Measurement type                                                                     | Main outcome                                                                                                                                                               |
|----------------------|--------------|---------------------|---------------|----------|--------------------------------------------------------------------------------------|----------------------------------------------------------------------------------------------------------------------------------------------------------------------------|
|                      | Cohort       | Size                | Follow-up     | Mean age |                                                                                      |                                                                                                                                                                            |
| <b>Burnham 2016</b>  | AIBL         | N=573               | 6 years       | 73       | - PiB-PET<br>- HC volume<br>- HC atrophy rate                                        | Subjects with abnormal amyloid and low hippocampal volume at baseline had faster hippocampal atrophy rates than those with normal biomarkers at baseline.                  |
| <b>Schott 2010</b>   | ADNI         | N=105               | 1 year        | 75       | - CSF amyloid<br>- HC atrophy rate<br>- Ventr atrophy rate<br>- WB atrophy rate      | A $\beta$ +: Increased atrophy rates (all measures).                                                                                                                       |
| <b>Andrews 2013</b>  | AIBL         | N=66                | 18 months     | 73       | - PiB-PET<br>- HC atrophy rate<br>- Ventr atrophy rate<br>- WB atrophy rate          | A $\beta$ +: Increased hippocampal atrophy rates. Non-significant higher rates of whole brain and ventricular atrophy.                                                     |
| <b>Doré 2013</b>     | AIBL         | N=93                | 36 months     | 74       | - PiB-PET<br>- Cortical thickness                                                    | A $\beta$ +: Increased atrophy rates in temporal lobe and hippocampus. Reduced cortical thickness in precuneus and hippocampus associated with episodic memory impairment. |
| <b>Nosheny 2014</b>  | ADNI         | N=566 including MCI | 4 years       | 75       | - PiB / AV45 PET<br>- HC atrophy rates                                               | A $\beta$ +: Increased hippocampal atrophy rates.                                                                                                                          |
| <b>Mattsson 2014</b> | ADNI         | N=47                | Up to 4 years | 76       | - ROI volumes<br>- Cortical thickness<br>- CSF amyloid                               | A $\beta$ +: Increased atrophy rates in frontoparietal regions, cingulate, amygdala and temporal regions.                                                                  |
| <b>Chetelat 2012</b> | AIBL         | N=74                | 18 months     | 74       | - PiB-PET                                                                            | A $\beta$ +: Higher rates of atrophy; highest significance in temporal neocortex and posterior cingulate cortex.                                                           |
| <b>Sabuncu 2011</b>  | ADNI         | N=92                | 1 year        | 67       | - CSF amyloid<br>- HC volume<br>- HC atrophy rate<br>- AD-regions cortical thickness | A $\beta$ +: Reduced baseline cortical thickness. No difference in hippocampal volume at baseline or atrophy rates.                                                        |

|                      |                            |         |                     |    |                                                              |                                                                                                                                                                         |
|----------------------|----------------------------|---------|---------------------|----|--------------------------------------------------------------|-------------------------------------------------------------------------------------------------------------------------------------------------------------------------|
| <b>Jack 2014</b>     | Mayo Clinic Study of Aging | N=252   | Median<br>1.4 years | 78 | - PiB-PET<br>- AD-signature region atrophy rate              | Increased brain atrophy rates in subjects with both A $\beta$ + and evidence of neurodegeneration (decreased hippocampal volume) at baseline                            |
| <b>Knopman 2013</b>  | Mayo Clinic Study of Aging | N=191   | 15 months           | 77 | - PiB-PET<br>- HC atrophy rates                              | Increased hippocampal atrophy rates in subjects with both A $\beta$ + and evidence of neurodegeneration (hippocampal atrophy or FDG-PET hypometabolism) at baseline.    |
| <b>Desikan 2011</b>  | ADNI                       | N=107   | Mean<br>2.14 year   | 76 | - CSF<br>- Entorhinal cortex atrophy                         | Increased entorhinal cortex atrophy only in subjects with both decreased CSF A $\beta$ and evidence of neurodegeneration (elevated CSF phosphorylated tau) at baseline. |
| <b>Ewers 2012</b>    | ADNI                       | N=124   | 2 years             | 76 | - PiB-PET                                                    | A $\beta$ +: Increased medial temporal lobe and precuneus volume decline                                                                                                |
| <b>Petersen 2016</b> | Mayo Clinic Study of Aging | N = 286 | Median<br>2.5 y     | 78 | - PiB-PET<br>- HC atrophy rates<br>- Ventricular enlargement | Increased hippocampal atrophy and ventricular enlargement rates associated with elevated amyloid levels.                                                                |
